# Supplementary material
Source: PubMed Central journal article supplement (PMC3370573)
Supplement: supp_80.6.1958_IAI-IAI00021-12-s01.pdf [file supp_80.6.1958_IAI-IAI00021-12-s01.pdf]

## Supplementary information

**Table S1:** Primers used for RT-PCR analysis

---

|                        |                                      |
|------------------------|--------------------------------------|
| <i>Ifng</i> forward    | 5'-GCCAAGCGGCTGACTGA-3'              |
| <i>Ifng</i> reverse    | 5'-TCAGTGAAGTAAAGGTACAAGCTACAATCT-3' |
| <i>Il17a</i> forward   | 5'-CCACGTCACCCTGGACTCTC-3'           |
| <i>Il17a</i> reverse   | 5'-CTCCGCATTGACACAGCG-3'             |
| <i>iNOS</i> forward    | 5'-GGAGCAGGTGGAAGACTATTTCTT-3'       |
| <i>iNOS</i> reverse    | 5'-CATGATAACGTTTCTGGCTCTTGA-3'       |
| <i>Tnfa</i> forward    | 5'-CATCTTCTCAA AATTCGAGTGACAA-3'     |
| <i>Tnfa</i> reverse    | 5'-TGGGAGTAGACAAGGTACAACCC-3'        |
| <i>Il12p35</i> forward | 5'-GATGACATGGTGAAGACGGCC-3'          |
| <i>Il12p35</i> reverse | 5'-GGAGGTTTCTGGCGCAGAGT-3'           |
| <i>Hmbs</i> forward    | 5'-GAAACTCTGCTTCGCTGCATT-3'          |
| <i>Hmbs</i> reverse    | 5'-TGCCCATCTTTCATCACTGTATG-3'        |

---

**Table S2**

Pulmonary IFN- $\gamma$  response of C57BL/6 mice infected intratracheally with *Mtb* WT, MGM1990 or MGM1991

| <b>A</b> | <b>IFN-<math>\gamma</math> production (pg/ml)</b> |               |                              |                             |               |
|----------|---------------------------------------------------|---------------|------------------------------|-----------------------------|---------------|
|          | <b>Group<sup>a</sup></b>                          | <b>rAg85A</b> | <b>85A<sub>241-260</sub></b> | <b>ESAT6<sub>1-20</sub></b> | <b>Medium</b> |
| WT       |                                                   | 4,550         | 3,770                        | 15,590                      | <5            |
| MGM1990  |                                                   | 8,690         | 10,790                       | 13,450                      | <5            |
| MGM1991  |                                                   | 2,130         | 2,170                        | 5,370                       | <5            |
| Naive    |                                                   | 30            | <5                           | <5                          | <5            |

  

| <b>B</b> | <b>IFN-<math>\gamma</math> (SFC/10<sup>6</sup> cells)</b> |               |                              |                             |               |
|----------|-----------------------------------------------------------|---------------|------------------------------|-----------------------------|---------------|
|          | <b>Group<sup>a</sup></b>                                  | <b>rAg85A</b> | <b>85A<sub>241-260</sub></b> | <b>ESAT6<sub>1-20</sub></b> | <b>Medium</b> |
| WT       |                                                           | 16            | 98                           | 436                         | 2             |
| MGM1990  |                                                           | 168           | 254                          | 494                         | 6             |
| MGM1991  |                                                           | 4             | 22                           | 62                          | 6             |
| Naive    |                                                           | ND            | ND                           | ND                          | ND            |

a Mice were infected with 10<sup>4</sup> CFU of *Mtb* WT, MGM1990 or MGM1991 by the intratracheal route. Lungs were recovered 3 weeks after the infection, homogenized and pulmonary leucocytes were cultured with 5 $\mu$ g/ml Ag85A, 10 $\mu$ g/ml 85A<sub>241-260</sub>, 10 $\mu$ g/ml ESAT6<sub>1-20</sub> or cultured in the absence of antigen (medium). (A) IFN- $\gamma$  secretion detected by ELISA in 72h culture supernatant. (B) IFN- $\gamma$  detected by ELISPOT assay. ND: no spots detected

**Table S3**

Spleen cell cytokine response of C57BL/6 mice infected intratracheally with  $10^4$  CFU of *Mtb* WT, MGM1990 or MGM1991

| <b>A</b>                 |                      | <b>IFN-<math>\gamma</math> secretion pg/ml</b> |               |  |
|--------------------------|----------------------|------------------------------------------------|---------------|--|
| <b>Group<sup>a</sup></b> | <b>PPD</b>           | <b>ESAT6<sub>1-20</sub></b>                    | <b>Medium</b> |  |
| WT                       | 41,890 $\pm$ 1,757   | 19,706 $\pm$ 8,182                             | <5            |  |
| MGM1990                  | 26,888 $\pm$ 13,276* | 5,127 $\pm$ 4,381**                            | <5            |  |
| MGM1991                  | 32,737 $\pm$ 1,758*  | 7,407 $\pm$ 3,729**                            | 213 $\pm$ 112 |  |
| Naive                    | 3,453 $\pm$ 5,097    | 1,340 $\pm$ 2,996                              | 27 $\pm$ 38   |  |
| <b>B</b>                 |                      | <b>IL-17A secretion pg/ml</b>                  |               |  |
| <b>Group<sup>a</sup></b> | <b>PPD</b>           | <b>ESAT6<sub>1-20</sub></b>                    | <b>Medium</b> |  |
| MGM1985                  | 35,2 $\pm$ 3,9       | 17,4 $\pm$ 12                                  | <4            |  |
| MGM1990                  | 42,5 $\pm$ 2,8**     | 6,6 $\pm$ 5                                    | <4            |  |
| MGM1991                  | 26,0 $\pm$ 14,2      | 11,5 $\pm$ 6,2                                 | <4            |  |
| Naive                    | <4                   | 11,5 $\pm$ 10                                  | <4            |  |

a Mice were infected with  $10^4$  CFU of *Mtb* WT, MGM1990 or MGM1991 by the intratracheal route. Splenocytes were recovered 3 weeks after infection and cultured with 25  $\mu$ g/ml PPD, 10  $\mu$ g/ml ESAT6<sub>1-20</sub> or cultured in the absence of antigen (medium). Results expressed as mean  $\pm$  SD cytokine levels (pg/ml) of four (MGM1991 /naive) or five (WT/1990) mice tested individually in each group. (A) IFN- $\gamma$  secretion, (B) IL-17A secretion. \*  $P < 0,05$  \*\*  $P < 0,01$  as compared to cytokine levels in mice infected with *Mtb* WT, (Mann-Whitney test )

**Table S4**

Spleen cell cytokine response of C57BL/6 mice infected intratracheally with 10<sup>4</sup> CFU of *Mtb* WT, MGM1990 or MGM1991

| <b>A</b>                                                                |                     |                              |               |
|-------------------------------------------------------------------------|---------------------|------------------------------|---------------|
| <b>IFN-<math>\gamma</math> secretion pg/ml (mean<math>\pm</math>SD)</b> |                     |                              |               |
| <b>Group<sup>a</sup></b>                                                | <b>PPD</b>          | <b>ESAT<sub>1-20</sub></b>   | <b>Medium</b> |
| WT                                                                      | 79,820 $\pm$ 26,214 | 39,916 $\pm$ 10,474          | <5            |
| MGM1990                                                                 | 49,930 $\pm$ 34,27  | 10,493 $\pm$ 9,188*          | 139 $\pm$ 311 |
| MGM1991                                                                 | 54,209 $\pm$ 1,020  | 14,960 $\pm$ 8,584*          | 104 $\pm$ 208 |
| Naive                                                                   | 2,790 $\pm$ 2,475   | <5                           | <5            |
| <b>B</b>                                                                |                     |                              |               |
| <b>IL-17A secretion pg/ml (mean<math>\pm</math>SD)</b>                  |                     |                              |               |
| <b>Group<sup>a</sup></b>                                                | <b>PPD</b>          | <b>ESAT<sub>6 1-20</sub></b> | <b>Medium</b> |
| WT                                                                      | 70 $\pm$ 26         | 31 $\pm$ 20                  | 6 $\pm$ 5     |
| MGM1990                                                                 | 57 $\pm$ 28         | 39 $\pm$ 17                  | 34 $\pm$ 23   |
| MGM1991                                                                 | 85 $\pm$ 21         | 33 $\pm$ 15                  | 17 $\pm$ 6    |
| Naive                                                                   | 38 $\pm$ 29         | 10 $\pm$ 5                   | 15 $\pm$ 7    |

a Mice were infected by 10<sup>4</sup> CFU of WT, MGM1990, or MGM1991 by the intratracheal route. Splenocytes were recovered 10 weeks after infection and cultured with 25  $\mu$ g/ml PPD, 10 $\mu$ g/ml ESAT<sub>6 1-20</sub> or cultured in the absence of antigen (medium). Cytokine production detected by ELISA. (A) IFN- $\gamma$  secretion, (B) IL-17A secretion. \*  $P$ <0,05 MGM1990 or MGM1991 vs WT, (Mann-Whitney test ).

**Fig S1: Confirmation of PDIM biosynthesis in mycolic acid methyltransferases knockouts.**

Wild type, MGM1990, or MGM1991 were labeled with C<sup>14</sup> propionic acid and chloroform:methanol extracts prepared. Shown are thin layer chromatography analysis of wt, MGM1990 and MGM1991, confirming the presence of PDIM.

**Fig S2: Mycolic acid analysis of *in vivo* revertants of MGM1990.**

After passage in a mouse, many colonies of MGM1990 assumed the morphology of MGM1991. Shown is TLC analysis of mycolic acid methyl esters from MGM1991, MGM1990, or 6 colony morphology variants that arose during mouse passage of MGM1990. To confirm loss of the inserted *mmaA3-mmaA4* cassette, mycolic acids were extracted from 6 colonies. Left: MGM1991. The rightmost strain was named MGM1995.

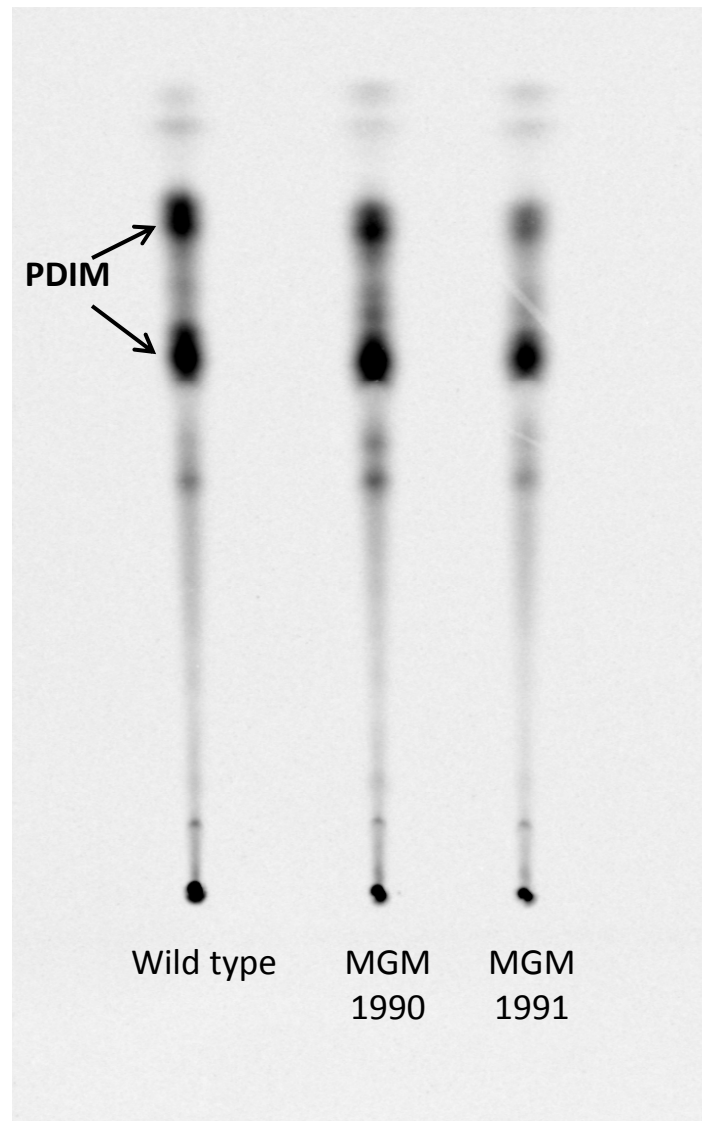

Figure S1

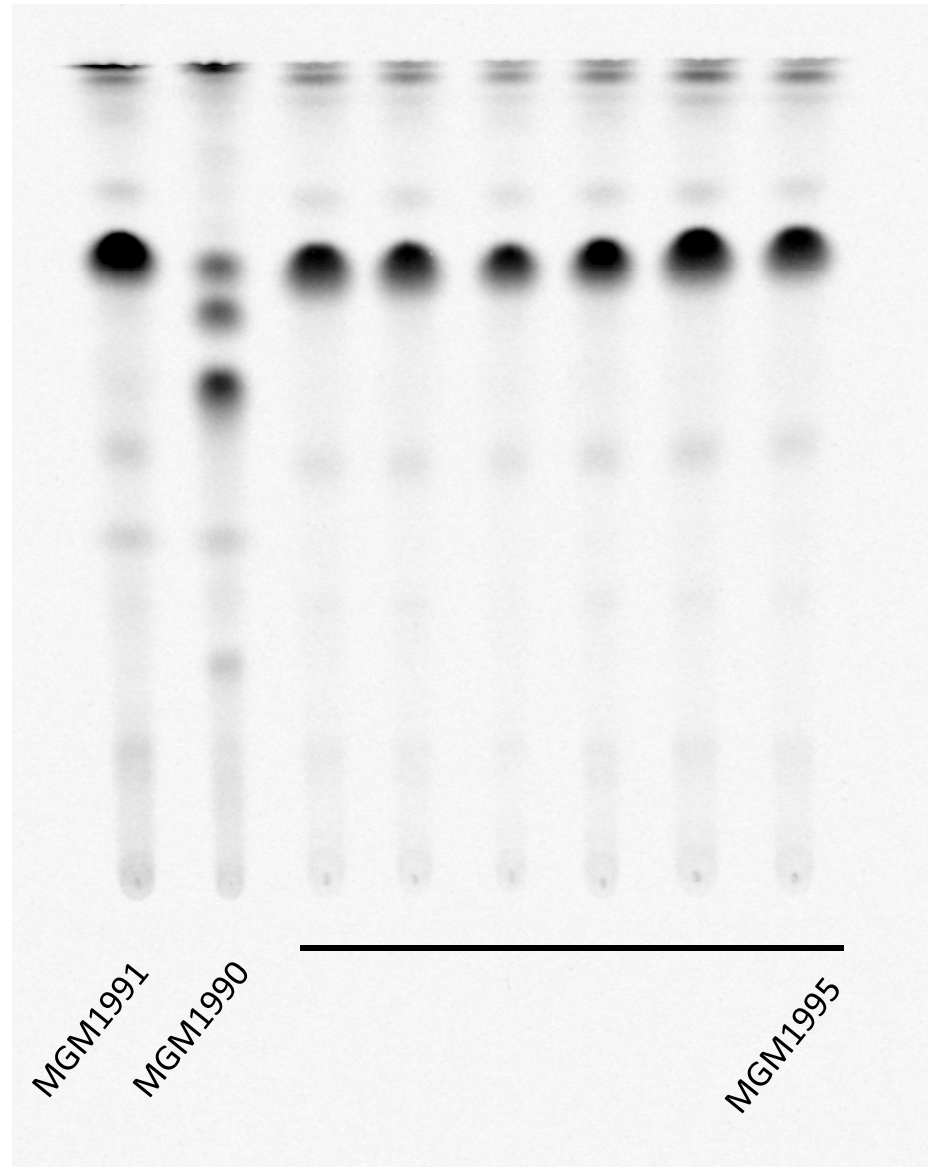

Figure S2
